# Supplementary material for: A Review: Proteomics in Retinal Artery Occlusion, Retinal Vein Occlusion, Diabetic Retinopathy and Acquired Macular Disorders
Source: PubMed Central journal article supplement (PMC5454820; doi:10.3390/ijms18050907), 2017-04-28
Supplement: ijms-18-00907-s001.pdf [file ijms-18-00907-s001.pdf]

## Supplementary material

### Retinal vein occlusion

Search output from Medline

|   | <b>Controlled term or natural language term</b>            | <b>Number of identified sources</b> |
|---|------------------------------------------------------------|-------------------------------------|
| 1 | Proteomics/                                                | 45790                               |
| 2 | Proteome/                                                  | 28281                               |
| 3 | (Proteogenomic* or proteomic* or proteome*).mp.            | 98781                               |
| 4 | or/1-3                                                     | 98781                               |
| 5 | Retinal Vein Occlusion/                                    | 3536                                |
| 6 | (Retina* and (occlusion or thrombos* or obstruction*)).mp. | 10597                               |
| 7 | 5 or 6                                                     | 10597                               |
| 8 | 4 and 7                                                    | 9                                   |

Search output from Embase

|   | <b>Controlled term or natural language term</b>            | <b>Number of identified sources</b> |
|---|------------------------------------------------------------|-------------------------------------|
| 1 | Exp proteomics/                                            | 72571                               |
| 2 | Proteome/                                                  | 31063                               |
| 3 | (Proteogenomic* or proteomic* or proteome*).mp.            | 108023                              |
| 4 | Or/1-3                                                     | 108023                              |
| 5 | Exp retinal vein occlusion/                                | 6632                                |
| 6 | (Retina* and (occlusion or thrombos* or obstruction*)).mp. | 16373                               |
| 7 | 5 or 6                                                     | 16377                               |
| 8 | 4 and 7                                                    | 26                                  |

### Diabetic retinopathy

Search output from Medline

|   | <b>Controlled term or natural language term</b> | <b>Number of identified sources</b> |
|---|-------------------------------------------------|-------------------------------------|
| 1 | Proteomics/                                     | 45790                               |
| 2 | Proteome/                                       | 28281                               |
| 3 | (Proteogenomic* or proteomic* or proteome*).mp. | 98781                               |
| 4 | or/1-3                                          | 98781                               |
| 5 | Diabetic Retinopathy/                           | 21986                               |
| 6 | (Diabet* and Retinopath*).mp.                   | 32356                               |
| 7 | 5 or 6                                          | 32356                               |
| 8 | 4 and 7                                         | 117                                 |

Search output from Embase

|   | <b>Controlled term or natural language term</b> | <b>Number of identified sources</b> |
|---|-------------------------------------------------|-------------------------------------|
| 1 | Exp proteomics/                                 | 72571                               |
| 2 | Proteome/                                       | 31063                               |
| 3 | (Proteogenomic* or proteomic* or proteome*).mp. | 108023                              |
| 4 | Or/1-3                                          | 108023                              |
| 5 | Exp diabetic retinopathy/                       | 34338                               |
| 6 | (Diabet* and Retinopath*).mp.                   | 44096                               |
| 7 | 5 or 6                                          | 44096                               |
| 8 | 4 and 7                                         | 176                                 |

### Age-related macular degeneration

Search output from Medline

|   | <b>Controlled term or natural language term</b>            | <b>Number of identified sources</b> |
|---|------------------------------------------------------------|-------------------------------------|
| 1 | Proteomics/                                                | 45790                               |
| 2 | Proteome/                                                  | 28281                               |
| 3 | (Proteogenomic* or proteomic* or proteome*).mp.            | 98781                               |
| 4 | or/1-3                                                     | 98781                               |
| 5 | Exp macular degeneration/                                  | 21129                               |
| 6 | ((Macula* or retinal) adj4 (degeneration* or atroph*)).mp. | 36455                               |
| 7 | 5 or 6                                                     | 41843                               |
| 8 | 4 and 7                                                    | 196                                 |

Search output from Embase

|   | <b>Controlled term or natural language term</b>            | <b>Number of identified sources</b> |
|---|------------------------------------------------------------|-------------------------------------|
| 1 | Exp proteomics/                                            | 72571                               |
| 2 | Proteome/                                                  | 31063                               |
| 3 | (Proteogenomic* or proteomic* or proteome*).mp.            | 108023                              |
| 4 | Or/1-3                                                     | 108023                              |
| 5 | Age related macular degeneration/                          | 3649                                |
| 6 | ((macula* or retinal) adj4 (degeneration* or atroph*)).mp. | 36512                               |
| 7 | 5 or 6                                                     | 36512                               |
| 8 | 4 and 7                                                    | 209                                 |

## Retinal artery occlusion

Search output from Medline

|   | <b>Controlled term or natural language term</b>            | <b>Number of identified sources</b> |
|---|------------------------------------------------------------|-------------------------------------|
| 1 | Proteomics/                                                | 38560                               |
| 2 | Proteome/                                                  | 24027                               |
| 3 | (Proteogenomic* or proteomic* or proteome*).mp.            | 85308                               |
| 4 | or/1-3                                                     | 85608                               |
| 5 | Exp Retinal artery occlusion/                              | 1939                                |
| 6 | (retina* and (occlusion or thrombos* or obstruction*)).mp. | 10327                               |
| 7 | 5 or 6                                                     | 10441                               |
| 8 | 4 and 7                                                    | 8                                   |

Search output from Embase

|   | <b>Controlled term or natural language term</b>            | <b>Number of identified sources</b> |
|---|------------------------------------------------------------|-------------------------------------|
| 1 | Exp Proteomics/                                            | 75218                               |
| 2 | Proteome/                                                  | 32429                               |
| 3 | (Proteogenomic* or proteomic* or proteome*).mp.            | 111992                              |
| 4 | or/1-3                                                     | 111992                              |
| 5 | Exp Retinal artery occlusion/                              | 4264                                |
| 6 | (retina* and (occlusion or thrombos* or obstruction*)).mp. | 16724                               |
| 7 | 5 or 6                                                     | 17059                               |
| 8 | 4 and 7                                                    | 28                                  |
